# Supplementary material
Source: PubMed Central journal article supplement (PMC4135633)
Supplement: JB.01747-14_zjb999093259so1.pdf [file JB.01747-14_zjb999093259so1.pdf]

*PvuII*

TAC**GAAGTTCCTATTCCGAAGTTCCTATTCTCTAGAAAGTATAGGAACTTC**-CAGCTG-

*XhoI*    *SalI*                  *ClaI*    *HindIII*    *EcoRV*    *EcoRI*    *PstI*    *SmaI*

-CTCGAG-GTCGAC-GGT-ATCGAT-AAGCTT-GATATC-GAATTC-CTGCAG-CCCGGG-

*BamHI*    *SpeI*                                  *SacII*                  *SacI*

GGATCC-ACTAGT-TCTAGAGCGGCCGCA-CCGCGG-TG-GAGCTC-**GAAGTTCCTATTC**

**CGAAGTTCCTATTCTCTAGAAAGTATAGGAACTTC**CGT

**Figure S1.** Multiple restriction site of pSCF flanked by two direct *FRT* sites (indicated in bold). Each nucleotide sequence corresponding to single restriction site (shown above the sequence) is detached by two dashes.
